# Supplementary material for: Selective, light-driven enzymatic dehalogenations of organic compounds
Source: Royal Society of Chemistry journal article supplement (doi:10.1039/c6ra19777a), 2016-01-01
Supplement: c6ra19777a1.pdf [file c6ra19777a1.pdf]

## Supplementary Information

### Selective, light-driven enzymatic dehalogenations of organic compounds

Bhavin Siritanaratkul<sup>†</sup>, Shams T. A. Islam<sup>†</sup>, Torsten Schubert<sup>‡</sup>, Cindy Kunze<sup>‡</sup>, Tobias Goris<sup>‡</sup>, Gabriele Diekert<sup>‡</sup> and Fraser A. Armstrong<sup>\*†</sup>

<sup>†</sup>Inorganic Chemistry Laboratory, Department of Chemistry, University of Oxford, South Parks Road, Oxford OX1 3QR, Oxfordshire, United Kingdom

<sup>‡</sup>Institut für Mikrobiologie, Friedrich-Schiller-Universität Jena, Lehrstuhl für Angewandte und Ökologische Mikrobiologie, Philosophenweg 12, 07743 Jena, Germany

#### UV irradiation of TiO<sub>2</sub>-PceA with *c*DCE

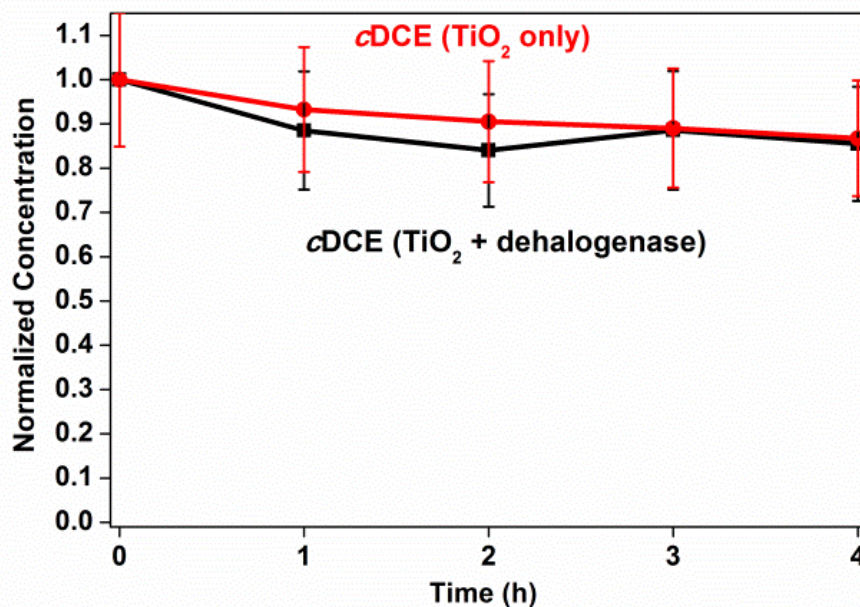

**Figure S1.** Time course of the *c*DCE concentration for reaction solutions containing both TiO<sub>2</sub> nanoparticles and PceA (black line) or TiO<sub>2</sub> only (red line), irradiated with UV light.

### PceA on a PGE electrode after injection of *c*DCE

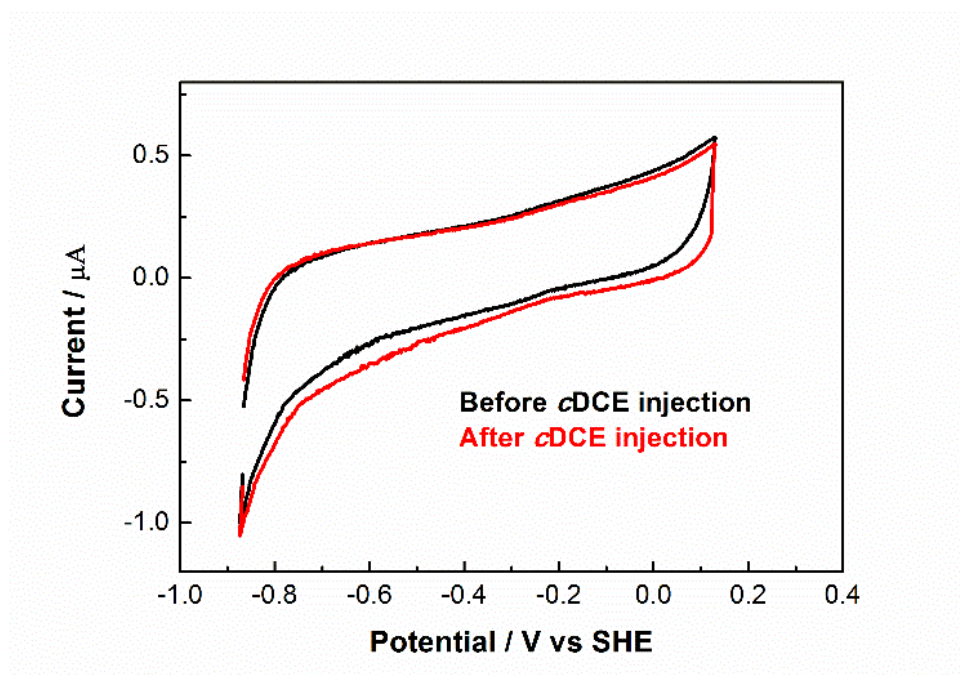

**Figure S2.** Cyclic voltammograms of PceA on a PGE electrode, before (black) and after (red) injection of *c*DCE 0.8 mM. Reaction conditions: Tris buffer, pH 7.0, 25 °C, scan rate 20 mV/s, electrode is stationary.

## Visible light-dye-modified TiO<sub>2</sub>

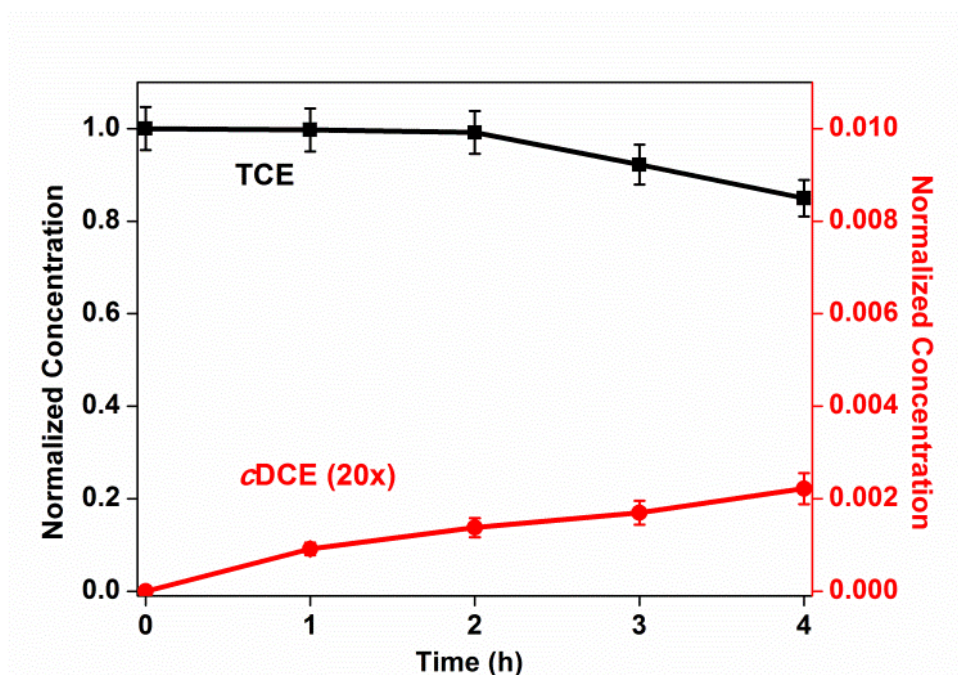

**Figure S3.** Time course of concentrations of TCE (black line, left axis) and cDCE (red line, magnified 20 times, right axis) for a Ru dye-TiO<sub>2</sub>-PceA system under visible light irradiation ( $\lambda > 420$  nm). The Ru system has been described previously.<sup>1,2</sup>

## References

1. E. Reisner, D. J. Powell, C. Cavazza, J. C. Fontecilla-Camps and F. A. Armstrong, *Journal of the American Chemical Society*, 2009, **131**, 18457-18466.
2. T. W. Woolerton, S. Sheard, E. Reisner, E. Pierce, S. W. Ragsdale and F. A. Armstrong, *Journal of the American Chemical Society*, 2010, **132**, 2132-2133.
